# Supplementary material for: Structural investigation of bromide complexation with bipodal, tripodal and tetrapodal cationic molecules
Source: Royal Society of Chemistry journal article supplement (doi:10.1039/d0ce00747a), 2020-01-01
Supplement: d0ce00747a1.pdf [file d0ce00747a1.pdf]

## Structural investigation of bromide complexation with bipodal, tripodal and tetrapodal cationic molecules

Irene Ling\*, Alexandre N. Sobolev, Loh Sze Le, Gemma F. Turner and Stephen A. Moggach

### Supplementary Information

#### A) Crystallography

Table S1. Selected hydrogen-bond parameters and short intermolecular contacts (Å, °) for compound I.

| <i>D</i> — <i>H</i> ⋯ <i>A</i> | <i>d</i> ( <i>D</i> — <i>H</i> ) | <i>d</i> ( <i>H</i> ⋯ <i>A</i> ) | <i>d</i> ( <i>D</i> ⋯ <i>A</i> ) | ∠( <i>D</i> — <i>H</i> ⋯ <i>A</i> ) |
|--------------------------------|----------------------------------|----------------------------------|----------------------------------|-------------------------------------|
| O01W-H01A⋯Br1                  | 0.85                             | 2.58                             | 3.420(3)                         | 170                                 |
| O01W-H01B...Br1 <sup>i</sup>   | 0.85                             | 2.50                             | 3.347(3)                         | 177                                 |
| O02W-H02A...Br2                | 0.85                             | 2.62                             | 3.455(4)                         | 168                                 |
| O02W-H02B...Br2 <sup>ii</sup>  | 0.85                             | 2.62                             | 3.445(3)                         | 165                                 |
| C10-H10A...Br2 <sup>iii</sup>  | 0.99                             | 2.99                             | 3.860(3)                         | 147                                 |
| C12-H12B...Br1                 | 0.99                             | 3.09                             | 3.858(3)                         | 135                                 |
| C15-H15B...Br2 <sup>iii</sup>  | 0.99                             | 3.11                             | 3.912(3)                         | 140                                 |
| C16-H16B...Br2 <sup>iii</sup>  | 0.99                             | 2.83                             | 3.755(3)                         | 156                                 |
| C40-H40A...Br2 <sup>ii</sup>   | 0.99                             | 2.83                             | 3.724(4)                         | 151                                 |
| C40-H40B...Br1 <sup>iv</sup>   | 0.99                             | 3.13                             | 3.990(4)                         | 146                                 |
| C42-H42A...Br1                 | 0.99                             | 3.11                             | 3.883(5)                         | 136                                 |
| C42-H42B...O02W                | 0.99                             | 2.49                             | 3.381(5)                         | 150                                 |
| C43-H43A...Br1                 | 0.99                             | 3.12                             | 3.832(5)                         | 130                                 |
| C45-H45A...Br1 <sup>iv</sup>   | 0.99                             | 3.08                             | 3.892(3)                         | 140                                 |
| C45-H45B...O01W                | 0.99                             | 2.54                             | 3.358(5)                         | 140                                 |
| C46-H46B...Br1 <sup>iv</sup>   | 0.99                             | 3.12                             | 4.033(7)                         | 153                                 |
| C47'-H47C...Br1 <sup>iv</sup>  | 0.99                             | 2.99                             | 3.804(6)                         | 141                                 |

Symmetry codes: (i)  $-x+1, -y+1, -z+1$ ; (ii)  $-x+2, -y, -z+1$ ; (iii)  $x-1, y, z$ ; (iv)  $x, -y+1/2, z+1/2$ .

Table S2. Selected hydrogen-bond parameters and short intermolecular contacts (Å, °) for compound **II**.

| $D-H\cdots A$                         | $d(D-H)$ | $d(H\cdots A)$ | $d(D\cdots A)$ | $\angle(D-H\cdots A)$ |
|---------------------------------------|----------|----------------|----------------|-----------------------|
| O01W-H01A $\cdots$ Br1                | 0.85     | 2.44           | 3.278(2)       | 169                   |
| O01W-H01B $\cdots$ O02W <sup>i</sup>  | 0.85     | 1.95           | 2.796(3)       | 172                   |
| O02W-H02A $\cdots$ Br1                | 0.85     | 2.50           | 3.320(2)       | 164                   |
| O02W-H02B $\cdots$ O01W <sup>ii</sup> | 0.85     | 1.90           | 2.742(3)       | 171                   |
| C10-H10A $\cdots$ Br2 <sup>iii</sup>  | 0.99     | 2.82           | 3.783(2)       | 165                   |
| C10-H10B $\cdots$ Br2 <sup>iv</sup>   | 0.99     | 3.12           | 4.007(2)       | 151                   |
| C12-H12B $\cdots$ Br1 <sup>i</sup>    | 0.99     | 2.92           | 3.821(3)       | 152                   |
| C16-H16A $\cdots$ Br1 <sup>i</sup>    | 0.99     | 2.99           | 3.872(2)       | 149                   |
| C16-H16B $\cdots$ O02W <sup>v</sup>   | 0.99     | 2.60           | 3.509(3)       | 152                   |
| C17-H17A $\cdots$ O01W                | 0.98     | 2.62           | 3.416(3)       | 138                   |
| C17-H17B $\cdots$ Br1 <sup>i</sup>    | 0.98     | 2.93           | 3.828(2)       | 153                   |
| C40-H40A $\cdots$ Br2 <sup>v</sup>    | 0.99     | 3.03           | 3.949(2)       | 154                   |
| C40-H40B $\cdots$ Br2                 | 0.99     | 2.94           | 3.846(2)       | 152                   |
| C42-H42A $\cdots$ Br2                 | 0.99     | 3.01           | 3.909(2)       | 152                   |
| C42-H42B $\cdots$ Br1                 | 0.99     | 3.12           | 3.751(2)       | 123                   |
| C43-H43A $\cdots$ Br2 <sup>vi</sup>   | 0.99     | 3.00           | 3.853(2)       | 145                   |
| C43-H43B $\cdots$ Br1                 | 0.99     | 2.89           | 3.571(2)       | 127                   |
| C45-H45A $\cdots$ Br1 <sup>v</sup>    | 0.99     | 2.86           | 3.680(2)       | 141                   |
| C47-H47A $\cdots$ Br2 <sup>v</sup>    | 0.98     | 2.97           | 3.900(2)       | 159                   |
| C47-H47B $\cdots$ Br2 <sup>vi</sup>   | 0.98     | 3.13           | 4.100(2)       | 173                   |
| C47-H47C $\cdots$ Br2                 | 0.98     | 3.08           | 3.962(2)       | 150                   |

Symmetry codes: (i)  $1-x, 1-y, -z$ ; (ii)  $x-1, y, z$ ; (iii)  $-x+1, -y+1, -z+1$ ; (iv)  $-x+2, -y+1, -z+1$ ; (v)  $x+1, y, z$ ; (vi)  $-x+2, -y+2, -z+1$ .

Table S3. Selected hydrogen-bond parameters and short intermolecular contacts (Å, °) for compound III.

| $D-H\cdots A$                   | $d(D-H)$ | $d(H\cdots A)$ | $d(D\cdots A)$ | $\angle(D-H\cdots A)$ |
|---------------------------------|----------|----------------|----------------|-----------------------|
| O01W-H01A...O06W                | 0.85     | 1.80           | 2.645(8)       | 180                   |
| O01W-H01B...O10W                | 0.85     | 1.88           | 2.732(16)      | 180                   |
| O02W-H02A...Br1                 | 0.85     | 2.49           | 3.341(5)       | 179                   |
| O02W-H02B...Br3                 | 0.85     | 2.55           | 3.402(4)       | 179                   |
| O03W-H03A...Br1                 | 0.85     | 2.44           | 3.286(3)       | 176                   |
| O03W-H03B...Br3                 | 0.85     | 2.44           | 3.288(3)       | 176                   |
| O04W-H04A...Br4                 | 0.85     | 2.51           | 3.351(5)       | 173                   |
| O04W-H04B...Br6 <sup>vii</sup>  | 0.85     | 2.65           | 3.484(6)       | 166                   |
| O04W-H04B...Br6 <sup>viii</sup> | 0.85     | 2.13           | 2.894(7)       | 149                   |
| O05W-H05A...O04W                | 0.85     | 1.86           | 2.710(7)       | 177                   |
| O05W-H05B...Br2                 | 0.85     | 2.44           | 3.289(5)       | 177                   |
| C110-H11A...Br3                 | 0.99     | 2.76           | 3.749(7)       | 173                   |
| C110-H11B...Br1 <sup>i</sup>    | 0.99     | 2.88           | 3.807(7)       | 156                   |
| C111-H11C...O06W                | 0.99     | 2.65           | 3.380(11)      | 131                   |
| C111-H11D...Br1 <sup>i</sup>    | 0.99     | 2.95           | 3.911(8)       | 163                   |
| C112-H11K...Br2 <sup>ii</sup>   | 0.98     | 2.93           | 3.900(9)       | 169                   |
| C113-H11F...O05W <sup>ii</sup>  | 0.99     | 2.62           | 3.544(10)      | 156                   |
| C114-H11L...Br5                 | 0.98     | 2.86           | 3.598(9)       | 132                   |
| C115-H11G...O01W                | 0.99     | 2.57           | 3.461(9)       | 149                   |
| C115-H11H...Br2 <sup>ii</sup>   | 0.99     | 3.05           | 3.981(8)       | 158                   |
| C130-H13A...O02W <sup>i</sup>   | 0.99     | 2.48           | 3.437(9)       | 162                   |
| C132-H13J...Br5 <sup>iii</sup>  | 0.98     | 3.07           | 4.012(10)      | 161                   |
| C133-H13E...O13W                | 0.99     | 2.65           | 3.561(8)       | 154                   |
| C133-H13F...Br3 <sup>i</sup>    | 0.99     | 2.83           | 3.782(8)       | 161                   |
| C134-H13N...Br6                 | 0.98     | 2.93           | 3.845(9)       | 156                   |
| C135-H13H...Br4 <sup>iv</sup>   | 0.99     | 2.93           | 3.764(7)       | 142                   |
| C150-H15A...Br5 <sup>iii</sup>  | 0.99     | 2.89           | 3.795(8)       | 152                   |
| C150-H15B...O03W                | 0.99     | 2.31           | 3.229(8)       | 154                   |
| C153-H15E...Br6 <sup>v</sup>    | 0.99     | 2.87           | 3.850(10)      | 170                   |
| C153-H15F...Br5 <sup>iii</sup>  | 0.99     | 2.96           | 3.853(11)      | 151                   |
| C153-H15F...O14W <sup>iii</sup> | 0.99     | 2.58           | 3.227(18)      | 123                   |
| C155-H15H...Br6 <sup>v</sup>    | 0.99     | 3.07           | 3.913(8)       | 144                   |
| C156-H15Q...Br5 <sup>iii</sup>  | 0.98     | 3.09           | 4.045(9)       | 165                   |
| C210-H21A...Br1 <sup>i</sup>    | 0.99     | 2.92           | 3.908(7)       | 178                   |
| C210-H21B...Br3                 | 0.99     | 2.93           | 3.908(7)       | 169                   |
| C211-H21R...Br2                 | 0.99     | 3.01           | 3.970(9)       | 165                   |
| C212-H21J...Br3                 | 0.98     | 2.62           | 3.477(14)      | 147                   |
| C22'-H22A...O07W                | 0.98     | 2.53           | 3.15(2)        | 121                   |
| C214-H21M...O08W <sup>vi</sup>  | 0.98     | 2.66           | 3.622(18)      | 168                   |
| C24'-H24C...Br3                 | 0.98     | 3.14           | 3.81(3)        | 127                   |
| C215-H21H...Br2                 | 0.99     | 2.87           | 3.749(10)      | 149                   |
| C216-H21O...Br4 <sup>i</sup>    | 0.98     | 3.03           | 3.947(12)      | 156                   |
| C216-H21Q...Br1 <sup>i</sup>    | 0.98     | 2.96           | 3.735(15)      | 136                   |
| C230-H23A...O03W                | 0.99     | 2.48           | 3.434(8)       | 161                   |
| C230-H23B...Br5 <sup>iii</sup>  | 0.99     | 2.92           | 3.902(8)       | 171                   |
| C231-H23C...O04W                | 0.99     | 2.59           | 3.563(8)       | 167                   |
| C232-H23I...O11W                | 0.98     | 2.45           | 3.322(16)      | 148                   |
| C232-H23J...Br5 <sup>iii</sup>  | 0.98     | 2.86           | 3.578(12)      | 131                   |
| C233-H23F...O14W <sup>iii</sup> | 0.99     | 2.39           | 3.272(17)      | 148                   |
| C234-H23N...Br6 <sup>vii</sup>  | 0.98     | 3.07           | 3.989(10)      | 158                   |
| C235-H23G...Br4                 | 0.99     | 3.09           | 3.925(7)       | 143                   |
| C235-H23H...Br2                 | 0.99     | 2.99           | 3.860(7)       | 148                   |
| C250-H25B...O02W <sup>i</sup>   | 0.99     | 2.42           | 3.343(10)      | 155                   |
| C251-H25D...Br2                 | 0.99     | 3.05           | 3.931(9)       | 149                   |

|                                 |      |      |          |     |
|---------------------------------|------|------|----------|-----|
| C253-H25F...Br6 <sup>viii</sup> | 0.99 | 2.99 | 3.964(9) | 166 |
| C255-H25G...Br6 <sup>viii</sup> | 0.99 | 3.03 | 3.923(9) | 151 |
| C255-H25H...Br2                 | 0.99 | 2.91 | 3.784(8) | 147 |

---

Symmetry codes: (i)  $x-1/2, -y+1/2, z-1/2$ ; (ii)  $x+1/2, -y+1/2, z-1/2$ ; (iii)  $-x+1/2, y-1/2, -z+1/2$ ; (iv)  $x, y, z-1$ ; (v)  $-x+1, -y, -z$ ; (vi)  $x-1/2, -y+1/2, z+1/2$ ; (vii)  $x, y, z+1$ ; (viii)  $-x, -y, -z$ .

Table S4. Selected hydrogen-bond parameters and short intermolecular contacts (Å, °) for compound IV.

| $D-H\cdots A$                    | $d(D-H)$ | $d(H\cdots A)$ | $d(D\cdots A)$ | $\angle(D-H\cdots A)$ |
|----------------------------------|----------|----------------|----------------|-----------------------|
| O01W-H01A...Br3                  | 0.85     | 2.45           | 3.281(4)       | 167                   |
| O01W-H01B...Br3 <sup>i</sup>     | 0.85     | 2.47           | 3.317(4)       | 172                   |
| O02W-H02A...Br4                  | 0.85     | 2.47           | 3.312(4)       | 174                   |
| O02W-H02B...Br4 <sup>ii</sup>    | 0.85     | 2.47           | 3.318(4)       | 178                   |
| O03W-H03A...Br2                  | 0.85     | 2.64           | 3.475(4)       | 167                   |
| O03W-H03B...Br1 <sup>iii</sup>   | 0.85     | 2.69           | 3.450(4)       | 150                   |
| C110-H11A...Br3 <sup>i</sup>     | 0.99     | 3.06           | 3.988(4)       | 157                   |
| C110-H11B...Br6                  | 0.99     | 2.84           | 3.707(5)       | 147                   |
| C110-H11B...O13W                 | 0.99     | 2.40           | 3.321(15)      | 154                   |
| C112-H11C...Br3 <sup>i</sup>     | 0.99     | 2.87           | 3.839(6)       | 166                   |
| C112-H11D...Br6                  | 0.99     | 2.54           | 3.447(7)       | 152                   |
| C112-H11D...Br6 <sup>iv</sup>    | 0.99     | 3.09           | 3.923(7)       | 142                   |
| C113-H11E...Br7                  | 0.99     | 3.02           | 3.975(7)       | 162                   |
| C113-H11E...O08W                 | 0.99     | 2.60           | 3.503(13)      | 152                   |
| C115-H11G...Br2 <sup>v</sup>     | 0.99     | 2.86           | 3.658(6)       | 139                   |
| C115-H11H...Br7                  | 0.99     | 3.11           | 4.044(6)       | 158                   |
| C116-H11I...O01W                 | 0.99     | 2.54           | 3.476(7)       | 158                   |
| C116-H11J...Br1                  | 0.99     | 2.93           | 3.898(5)       | 165                   |
| C117-H11K...O13W                 | 0.98     | 2.63           | 3.486(15)      | 146                   |
| C117-H11L...Br7                  | 0.98     | 2.72           | 3.673(6)       | 164                   |
| C130-H13A...Br4 <sup>ii</sup>    | 0.99     | 2.79           | 3.754(4)       | 166                   |
| C130-H13B...Br3                  | 0.99     | 2.79           | 3.765(4)       | 167                   |
| C132-H13D...O234 <sup>ii</sup>   | 0.99     | 2.54           | 3.250(6)       | 129                   |
| C133-H13E...Br5 <sup>vi</sup>    | 0.99     | 3.08           | 4.037(4)       | 162                   |
| C133-H13F...Br1 <sup>vii</sup>   | 0.99     | 3.06           | 4.019(5)       | 164                   |
| C135-H13H...O03W <sup>v</sup>    | 0.99     | 2.54           | 3.335(6)       | 137                   |
| C136-H13I...Br1                  | 0.99     | 2.77           | 3.705(4)       | 158                   |
| C137-H13L...Br1                  | 0.98     | 3.11           | 3.919(5)       | 140                   |
| C137-H13M...Br1 <sup>vii</sup>   | 0.98     | 2.89           | 3.834(4)       | 161                   |
| C150-H15A...Br5                  | 0.99     | 2.70           | 3.662(4)       | 165                   |
| C150-H15B...Br4                  | 0.99     | 2.74           | 3.710(4)       | 165                   |
| C152-H15C...Br5                  | 0.99     | 3.13           | 4.010(4)       | 148                   |
| C153-H15E...O254 <sup>ii</sup>   | 0.99     | 2.57           | 3.201(5)       | 121                   |
| C153-H15F...Br7 <sup>viii</sup>  | 0.99     | 2.63           | 3.569(5)       | 158                   |
| C155-H15G...Br5 <sup>ix</sup>    | 0.99     | 3.04           | 3.788(4)       | 133                   |
| C155-H15G...O05W <sup>v</sup>    | 0.99     | 2.65           | 3.435(10)      | 137                   |
| C155-H15G...O11W                 | 0.99     | 2.55           | 3.470(9)       | 154                   |
| C156-H15I...Br1                  | 0.99     | 2.85           | 3.773(4)       | 156                   |
| C157-H15M...Br1                  | 0.98     | 3.07           | 3.889(4)       | 142                   |
| C210-H21A...Br6                  | 0.99     | 2.72           | 3.704(4)       | 176                   |
| C210-H21B...Br3 <sup>i</sup>     | 0.99     | 2.77           | 3.751(4)       | 169                   |
| C212-H21C...Br6 <sup>iv</sup>    | 0.99     | 2.43           | 3.424(5)       | 178                   |
| C213-H21E...O134 <sup>i</sup>    | 0.99     | 2.65           | 3.260(6)       | 120                   |
| C213-H21F...Br5 <sup>iv</sup>    | 0.99     | 2.91           | 3.900(5)       | 175                   |
| C215-H21G...O10W                 | 0.99     | 2.33           | 2.994(9)       | 124                   |
| C216-H21J...Br2                  | 0.99     | 3.07           | 3.975(5)       | 153                   |
| C216-H21J...O09W                 | 0.99     | 2.48           | 3.163(14)      | 126                   |
| C217-H21K...Br2                  | 0.98     | 2.98           | 3.846(5)       | 148                   |
| C230-H23A...Br5                  | 0.99     | 2.92           | 3.860(4)       | 159                   |
| C230-H23B...Br4                  | 0.99     | 3.14           | 4.075(4)       | 158                   |
| C232-H23C...O154 <sup>viii</sup> | 0.99     | 2.66           | 3.307(6)       | 124                   |
| C232-H23D...Br4                  | 0.99     | 2.98           | 3.941(6)       | 164                   |
| C233-H23E...O154 <sup>viii</sup> | 0.99     | 2.64           | 3.233(6)       | 119                   |
| C233-H23F...Br5 <sup>viii</sup>  | 0.99     | 3.12           | 3.787(5)       | 126                   |

|                                |      |      |           |     |
|--------------------------------|------|------|-----------|-----|
| C235-H23G...Br1 <sup>iii</sup> | 0.99 | 2.92 | 3.706(5)  | 137 |
| C236-H23I...Br2                | 0.99 | 2.93 | 3.898(4)  | 166 |
| C236-H23J...O02W <sup>ii</sup> | 0.99 | 2.60 | 3.535(6)  | 158 |
| C237-H23K...Br7 <sup>iii</sup> | 0.98 | 3.12 | 4.033(6)  | 155 |
| C237-H23L...O09W               | 0.98 | 2.23 | 2.811(17) | 117 |
| C237-H23M...O214 <sup>iv</sup> | 0.98 | 2.43 | 3.135(6)  | 129 |
| C250-H25A...Br3                | 0.99 | 2.89 | 3.845(5)  | 162 |
| C250-H25B...Br4 <sup>ii</sup>  | 0.99 | 2.91 | 3.863(4)  | 163 |
| C252-H25D...Br2                | 0.99 | 2.75 | 3.679(4)  | 157 |
| C253-H25F...O03W               | 0.99 | 2.49 | 3.299(6)  | 138 |
| C255-H25H...Br2 <sup>x</sup>   | 0.99 | 3.05 | 4.005(5)  | 163 |
| C256-H25I...O114 <sup>i</sup>  | 0.99 | 2.56 | 3.268(6)  | 128 |
| C256-H25J...Br4 <sup>ii</sup>  | 0.99 | 3.05 | 3.987(4)  | 159 |
| C257-H25K...Br2                | 0.98 | 3.12 | 3.913(5)  | 139 |
| C257-H25L...Br2 <sup>x</sup>   | 0.98 | 2.95 | 3.890(4)  | 162 |

Symmetry codes: (i)  $-x+1, -y+1, -z+1$ ; (ii)  $-x+1/2, -y+1/2, -z+1$ ; (iii)  $x, y-1, z$ ; (iv)  $-x+1, y, -z+3/2$ ; (v)  $x, y+1, z$ ; (vi)  $x, -y+1, z-1/2$ ; (vii)  $-x+1/2, -y+3/2, -z+1$ ; (viii)  $-x+1/2, y-1/2, -z+3/2$ ; (ix)  $-x+1/2, y+1/2, -z+3/2$ ; (x)  $-x+1, -y, -z+1$ .

Table S5. Selected hydrogen-bond parameters and short intermolecular contacts (Å, °) for compound V.

| $D-H\cdots A$                         | $d(D-H)$ | $d(H\cdots A)$ | $d(D\cdots A)$ | $\angle(D-H\cdots A)$ |
|---------------------------------------|----------|----------------|----------------|-----------------------|
| O01W-H01A $\cdots$ Br1                | 0.85     | 2.50           | 3.344(3)       | 173                   |
| O01W-H01B $\cdots$ Br2                | 0.85     | 2.50           | 3.335(4)       | 169                   |
| O02W-H02A $\cdots$ O01W               | 0.85     | 1.99           | 2.834(4)       | 176                   |
| O02W-H02B $\cdots$ Br3                | 0.85     | 2.53           | 3.378(5)       | 173                   |
| O02W-H02B $\cdots$ Br4                | 0.85     | 2.69           | 3.352(4)       | 135                   |
| C10-H10A $\cdots$ O06W <sup>i</sup>   | 0.99     | 2.38           | 3.35(2)        | 166                   |
| C10-H10B $\cdots$ Br4 <sup>i</sup>    | 0.99     | 2.99           | 3.780(4)       | 137                   |
| C12-H12A $\cdots$ Br4 <sup>i</sup>    | 0.99     | 2.84           | 3.741(6)       | 151                   |
| C12-H12B $\cdots$ O05W <sup>i</sup>   | 0.99     | 2.46           | 3.343(7)       | 149                   |
| C13-H13A $\cdots$ O06W                | 0.99     | 2.30           | 3.13(2)        | 141                   |
| C14-H14B $\cdots$ O05W                | 0.99     | 2.46           | 3.401(8)       | 158                   |
| C15-H15A $\cdots$ O04W                | 0.99     | 2.34           | 3.281(7)       | 159                   |
| C15-H15B $\cdots$ Br1                 | 0.99     | 2.82           | 3.799(5)       | 171                   |
| C32-H32A $\cdots$ Br4 <sup>ii</sup>   | 0.99     | 3.11           | 3.877(5)       | 136                   |
| C32-H32B $\cdots$ O01W <sup>ii</sup>  | 0.99     | 2.55           | 3.420(6)       | 146                   |
| C33-H33A $\cdots$ Br2                 | 0.99     | 2.99           | 3.806(5)       | 141                   |
| C33-H33B $\cdots$ Br1 <sup>ii</sup>   | 0.99     | 3.12           | 4.016(4)       | 151                   |
| C35-H35A $\cdots$ Br2 <sup>ii</sup>   | 0.99     | 2.69           | 3.675(4)       | 174                   |
| C36-H36A $\cdots$ Br2                 | 0.99     | 3.05           | 4.034(4)       | 173                   |
| C37-H37B $\cdots$ Br4 <sup>iii</sup>  | 0.99     | 3.00           | 3.890(5)       | 151                   |
| C50-H50A $\cdots$ Br2 <sup>iv</sup>   | 0.99     | 2.96           | 3.782(4)       | 142                   |
| C50-H50B $\cdots$ Br3 <sup>iii</sup>  | 0.99     | 3.01           | 3.939(4)       | 157                   |
| C50-H50B $\cdots$ O06W <sup>iii</sup> | 0.99     | 2.35           | 3.20(3)        | 144                   |
| C52-H52A $\cdots$ Br2 <sup>iv</sup>   | 0.99     | 2.91           | 3.859(5)       | 160                   |
| C52-H52B $\cdots$ Br1 <sup>v</sup>    | 0.99     | 3.08           | 4.049(5)       | 168                   |
| C52-H52A $\cdots$ Br2 <sup>iv</sup>   | 0.99     | 2.91           | 3.859(5)       | 160                   |
| C53-H53B $\cdots$ Br3 <sup>iii</sup>  | 0.99     | 2.91           | 3.482(12)      | 118                   |
| C54-H54A $\cdots$ Br3 <sup>iii</sup>  | 0.99     | 2.19           | 3.077(9)       | 148                   |
| C55-H55D $\cdots$ Br1                 | 0.99     | 2.90           | 3.821(5)       | 155                   |

Symmetry codes: (i)  $-x+3/2, y+1/2, -z+3/2$ ; (ii)  $-x+1/2, y+1/2, -z+3/2$ ; (iii)  $x-1/2, -y+1/2, z-1/2$ ; (iv)  $x+1/2, -y+1/2, z-1/2$ ; (v)  $-x+1, -y, -z+1$ .

Table S6. Selected hydrogen-bond parameters and short intermolecular contacts (Å, °) for compound VI.

| <i>D—H···A</i>                 | <i>d(D—H)</i> | <i>d(H···A)</i> | <i>d(D···A)</i> | $\angle(D—H···A)$ |
|--------------------------------|---------------|-----------------|-----------------|-------------------|
| O01W-H01A···Br1                | 0.85          | 2.45            | 3.302(2)        | 179               |
| O01W-H01B...Br3 <sup>i</sup>   | 0.85          | 2.55            | 3.354(2)        | 157               |
| O02W-H02A...O01W               | 0.85          | 1.94            | 2.774(3)        | 169               |
| O02W-H02B...Br2                | 0.85          | 2.52            | 3.352(2)        | 167               |
| O03W-H03A...Br2                | 0.85          | 2.47            | 3.283(2)        | 160               |
| O03W-H03B...Br3                | 0.85          | 2.42            | 3.241(2)        | 161               |
| O04W-H04A...O02W               | 0.85          | 1.87            | 2.720(3)        | 176               |
| O04W-H04B...Br1 <sup>ii</sup>  | 0.85          | 2.47            | 3.316(2)        | 174               |
| C10-H10A...Br3 <sup>iii</sup>  | 0.99          | 2.96            | 3.893(2)        | 157               |
| C10-H10B...Br2 <sup>iv</sup>   | 0.99          | 2.83            | 3.747(2)        | 155               |
| C15-H15B...Br2 <sup>v</sup>    | 0.99          | 3.07            | 3.999(3)        | 158               |
| C16-H16A...Br2 <sup>iv</sup>   | 0.99          | 2.89            | 3.811(3)        | 156               |
| C17-H17A...Br3 <sup>iii</sup>  | 0.98          | 2.99            | 3.904(3)        | 156               |
| C17-H17C...Br3 <sup>i</sup>    | 0.98          | 2.84            | 3.777(2)        | 161               |
| C32-H32A...Br2                 | 0.99          | 2.72            | 3.670(3)        | 161               |
| C32-H32B...Br2 <sup>iii</sup>  | 0.99          | 2.79            | 3.773(3)        | 175               |
| C33-H33B...O02W <sup>iii</sup> | 0.99          | 2.66            | 3.381(4)        | 130               |
| C37-H37A...O03W <sup>iii</sup> | 0.98          | 2.33            | 3.274(4)        | 161               |
| C37-H37B...Br2                 | 0.98          | 3.11            | 3.975(3)        | 148               |
| C37-H37C...Br1                 | 0.98          | 3.04            | 3.899(3)        | 147               |
| C50-H50B...O04W <sup>vi</sup>  | 0.99          | 2.49            | 3.412(3)        | 155               |
| C52-H52A...Br3 <sup>iv</sup>   | 0.99          | 3.06            | 3.944(3)        | 150               |
| C52-H52B...Br3 <sup>vii</sup>  | 0.99          | 3.06            | 3.860(3)        | 139               |
| C55-H55A...O04W <sup>vi</sup>  | 0.99          | 2.43            | 3.400(3)        | 166               |
| C56-H56A...Br1                 | 0.99          | 2.97            | 3.782(2)        | 140               |
| C57-H57A...O03W <sup>iv</sup>  | 0.98          | 2.44            | 3.389(4)        | 162               |
| C57-H57C...O02W <sup>v</sup>   | 0.98          | 2.64            | 3.469(4)        | 143               |

Symmetry codes: (i)  $x, y+1, z$ ; (ii)  $x+1/2, -y+3/2, z+1/2$ ; (iii)  $x, -y+1, z+1/2$ ; (iv)  $x-1/2, y+1/2, z$ ; (v)  $x-1/2, -y+3/2, z-1/2$ ; (vi)  $x-1/2, y-1/2, z$ ; (vii)  $x-1/2, -y+1/2, z-1/2$ .



Table S7. Selected hydrogen-bond parameters and short intermolecular contacts (Å, °) for compound VII.

| $D-H\cdots A$                        | $d(D-H)$ | $d(H\cdots A)$ | $d(D\cdots A)$ | $\angle(D-H\cdots A)$ |
|--------------------------------------|----------|----------------|----------------|-----------------------|
| C10-H10A $\cdots$ Br2 <sup>ii</sup>  | 0.99     | 2.95           | 3.786(2)       | 143                   |
| C12-H12 $\cdots$ Br2 <sup>ii</sup>   | 0.95     | 2.73           | 3.581(2)       | 149                   |
| C14-H14 $\cdots$ O01W                | 0.95     | 2.36           | 3.253(3)       | 157                   |
| C15-H15 $\cdots$ Br2                 | 0.95     | 2.76           | 3.668(2)       | 160                   |
| C16-H16C $\cdots$ Br2 <sup>iii</sup> | 0.98     | 3.01           | 3.776(3)       | 136                   |
| C20-H20A $\cdots$ Br1 <sup>iv</sup>  | 0.99     | 2.93           | 3.874(2)       | 160                   |
| C20-H20B $\cdots$ Br1 <sup>iii</sup> | 0.99     | 2.68           | 3.651(2)       | 166                   |
| C22-H22 $\cdots$ Br2 <sup>i</sup>    | 0.95     | 2.76           | 3.638(2)       | 154                   |
| C24-H24 $\cdots$ Br1 <sup>v</sup>    | 0.95     | 3.00           | 3.878(2)       | 154                   |
| C24-H24 $\cdots$ O02W <sup>vi</sup>  | 0.95     | 2.53           | 3.221(4)       | 130                   |
| C25-H25 $\cdots$ O03W <sup>vi</sup>  | 0.95     | 2.62           | 3.16(13)       | 117                   |
| C26-H26A $\cdots$ Br2 <sup>i</sup>   | 0.98     | 3.03           | 3.939(3)       | 155                   |
| C26-H26B $\cdots$ Br2 <sup>ii</sup>  | 0.98     | 3.11           | 3.647(3)       | 116                   |
| C26-H26C $\cdots$ Br1 <sup>vii</sup> | 0.98     | 3.14           | 3.945(3)       | 141                   |

Symmetry codes: (i)  $-x+1, -y+1, -z+1$ ; (ii)  $x, y+1, z$ ; (iii)  $-x+1/2, y+1/2, -z+1/2$ ; (iv)  $x+1/2, y+1/2, z$ ; (v)  $-x+1/2, y+3/2, -z+1/2$ ; (vi)  $x, -y+1, z-1/2$ ; (vii)  $x+1/2, y+3/2, z$ .

Table S8. Selected hydrogen-bond parameters and short intermolecular contacts (Å, °) for compound VIII.

| $D-H\cdots A$                  | $d(D-H)$ | $d(H\cdots A)$ | $d(D\cdots A)$ | $\angle(D-H\cdots A)$ |
|--------------------------------|----------|----------------|----------------|-----------------------|
| O1W-H1A...Br1                  | 0.85     | 2.54           | 3.384(6)       | 174                   |
| O1W-H1B...Br5                  | 0.85     | 2.17           | 3.014(7)       | 174                   |
| O2W-H2A...O1W                  | 0.85     | 2.11           | 2.962(9)       | 178                   |
| O2W-H2B...O4W                  | 0.85     | 2.00           | 2.851(6)       | 178                   |
| O3W-H3A...O7W                  | 0.85     | 1.77           | 2.59(4)        | 164                   |
| O3W-H3A...O7'                  | 0.85     | 1.94           | 2.78(3)        | 174                   |
| O3W-H3B...O8W                  | 0.85     | 1.87           | 2.719(14)      | 178                   |
| O3W-H3B...O5'                  | 0.85     | 1.85           | 2.67(4)        | 162                   |
| O4W-H4A...Br4                  | 0.85     | 2.43           | 3.277(4)       | 173                   |
| O4W-H4B...O6W                  | 0.85     | 1.85           | 2.699(11)      | 176                   |
| O4W-H4B...O6'                  | 0.85     | 2.33           | 3.156(15)      | 166                   |
| C10-H10B...Br2 <sup>i</sup>    | 0.99     | 2.89           | 3.814(7)       | 156                   |
| C10-H10B...O8 <sup>ii</sup>    | 0.99     | 2.58           | 3.284(10)      | 128                   |
| C11-H11B...O3W <sup>iii</sup>  | 0.99     | 2.60           | 3.522(10)      | 155                   |
| C11-H11A...Br1                 | 0.99     | 3.02           | 3.887(8)       | 147                   |
| C12-H12A...Br5                 | 0.99     | 2.78           | 3.742(8)       | 164                   |
| C12-H12B...Br2 <sup>iv</sup>   | 0.99     | 2.92           | 3.768(8)       | 144                   |
| C13-H13B...Br3                 | 0.99     | 3.11           | 3.885(7)       | 136                   |
| C14-H14A...Br2 <sup>i</sup>    | 0.99     | 3.03           | 3.902(7)       | 148                   |
| C14-H14B...Br3                 | 0.99     | 3.08           | 3.839(7)       | 135                   |
| C15-H15A...Br1                 | 0.98     | 3.00           | 3.888(8)       | 151                   |
| C15-H15B...Br2'                | 0.98     | 2.54           | 3.451(11)      | 155                   |
| C15-H15C...Br5                 | 0.98     | 3.12           | 3.916(8)       | 140                   |
| C20-H20B...Br1 <sup>i</sup>    | 0.99     | 2.99           | 3.865(7)       | 148                   |
| C21-H21B...Br1 <sup>i</sup>    | 0.99     | 2.88           | 3.743(7)       | 146                   |
| C23-H23B...Br3 <sup>v</sup>    | 0.99     | 3.13           | 3.938(8)       | 139                   |
| C24-H24B...O6W <sup>i</sup>    | 0.99     | 2.51           | 3.420(11)      | 152                   |
| C25-H25A...O8'                 | 0.98     | 2.49           | 3.344(10)      | 145                   |
| C25-H25B...Br1 <sup>i</sup>    | 0.98     | 2.94           | 3.819(7)       | 150                   |
| C25-H25C...O3W                 | 0.98     | 2.55           | 3.488(10)      | 160                   |
| C30-H30A...Br5 <sup>ii</sup>   | 0.99     | 2.91           | 3.795(7)       | 149                   |
| C30-H30B...Br1 <sup>vi</sup>   | 0.99     | 2.96           | 3.852(7)       | 151                   |
| C31-H31A...Br4 <sup>vi</sup>   | 0.99     | 3.13           | 3.753(7)       | 122                   |
| C31-H31A...Br5 <sup>ii</sup>   | 0.99     | 2.76           | 3.725(8)       | 164                   |
| C31-H31B...Br1 <sup>vi</sup>   | 0.99     | 3.00           | 3.824(8)       | 141                   |
| C32-H32A...Br6 <sup>vii</sup>  | 0.99     | 2.98           | 3.938(8)       | 163                   |
| C32-H32B...Br2                 | 0.99     | 3.04           | 3.878(7)       | 143                   |
| C33-H33B...Br4 <sup>viii</sup> | 0.99     | 3.01           | 3.912(8)       | 152                   |
| C34-H34B...Br6 <sup>ii</sup>   | 0.99     | 2.70           | 3.669(8)       | 166                   |
| C35-H35A...Br1 <sup>vi</sup>   | 0.98     | 3.03           | 3.894(8)       | 148                   |
| C35-H35B...Br2                 | 0.98     | 2.84           | 3.800(7)       | 166                   |
| C35-H35C...Br2'                | 0.98     | 2.67           | 3.444(10)      | 136                   |
| C40-H40A...Br1 <sup>ix</sup>   | 0.99     | 3.10           | 3.957(7)       | 146                   |
| C40-H40B...Br2 <sup>ii</sup>   | 0.99     | 2.76           | 3.493(10)      | 132                   |
| C40-H40B...Br3 <sup>ii</sup>   | 0.99     | 2.94           | 3.885(7)       | 159                   |
| C41-H41A...Br1 <sup>ix</sup>   | 0.99     | 2.88           | 3.762(7)       | 148                   |
| C42-H42A...Br5 <sup>ix</sup>   | 0.99     | 2.94           | 3.909(8)       | 168                   |
| C43-H43B...Br4                 | 0.99     | 3.01           | 3.915(8)       | 152                   |
| C44-H44B...Br6 <sup>ii</sup>   | 0.99     | 3.03           | 3.954(7)       | 156                   |
| C45-H45B...Br4                 | 0.98     | 3.10           | 4.046(7)       | 163                   |
| C45-H45C...Br1 <sup>ix</sup>   | 0.98     | 2.91           | 3.801(7)       | 152                   |

Symmetry codes: (i)  $-x+1, -y+1, -z+1$ ; (ii)  $-x+1, -y+1, -z+2$ ; (iii)  $x-1, y, z$ ; (iv)  $x-1, y+1, z$ ; (v)  $-x+1, -y+2, -z+1$ ; (vi)  $x+1, y, z$ ; (vii)  $x+1, y-1, z$ ; (viii)  $-x+1, -y, -z+2$ ; (ix)  $-x, -y+1, -z+2$ .

Table S9. Selected hydrogen-bond parameters and short intermolecular contacts (Å, °) for compound IX.

| <i>D—H···A</i>                  | <i>d(D—H)</i> | <i>d(H···A)</i> | <i>d(D···A)</i> | $\angle(D—H···A)$ |
|---------------------------------|---------------|-----------------|-----------------|-------------------|
| O01W-H01B···Br1 <sup>ii</sup>   | 0.848(5)      | 2.397(6)        | 3.2421(14)      | 175(2)            |
| O01W-H01A...O02W <sup>iii</sup> | 0.844(5)      | 1.895(6)        | 2.732(2)        | 171(3)            |
| O02W-H02B...O01W                | 0.842(5)      | 1.976(8)        | 2.785(2)        | 161(2)            |
| O02W-H02A...Br2                 | 0.845(5)      | 2.447(6)        | 3.2874(15)      | 173(2)            |
| O03W-H03A...Br2                 | 0.849(5)      | 2.513(7)        | 3.3464(15)      | 167(2)            |
| O03W-H03B...Br2 <sup>iv</sup>   | 0.851(5)      | 2.521(10)       | 3.3377(14)      | 161(2)            |
| C11-H11B...O03W <sup>i</sup>    | 0.99          | 2.55            | 3.454(2)        | 151               |
| C12-H12B...O02W <sup>iii</sup>  | 0.99          | 2.64            | 3.528(2)        | 149               |
| C15-H15A...O01W                 | 0.99          | 2.49            | 3.366(2)        | 148               |
| C17-H17B...Br1                  | 0.99          | 2.99            | 3.7222(17)      | 132               |
| C32-H32A...Br1                  | 0.99          | 3.01            | 3.7646(16)      | 134               |
| C33-H33A...Br1 <sup>v</sup>     | 0.99          | 2.86            | 3.7843(18)      | 156               |
| C35-H35A...O01W                 | 0.99          | 2.58            | 3.363(2)        | 136               |
| C35-H35B...Br2                  | 0.99          | 3.01            | 3.7490(16)      | 132               |
| C35-H35B...O03W                 | 0.99          | 2.50            | 3.350(2)        | 144               |
| C36-H36A...O03W                 | 0.99          | 2.60            | 3.472(2)        | 148               |
| C36-H36B...Br1 <sup>v</sup>     | 0.99          | 2.97            | 3.9271(16)      | 162               |

Symmetry codes: (i)  $-x+1, -y+1, -z+1$ ; (ii)  $x-1, y, z$ ; (iii)  $-x, -y+1, -z+1$ ; (iv)  $-x+1, -y+1, -z+2$ ; (v)  $-x+1, -y, -z+1$ .

## B) Hirshfeld surface analysis

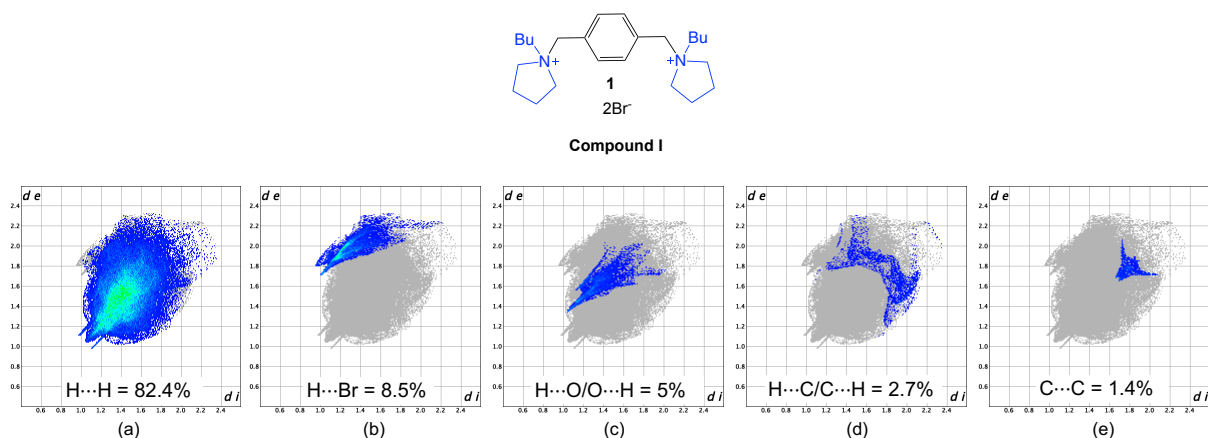

Figure S1. (Top) Chemical diagram for compound **I**. Fingerprint plots delineated into (a)  $H\cdots H$ , (b)  $H\cdots Br$ , (c)  $H\cdots O / O\cdots H$ , (d)  $H\cdots C / C\cdots H$ , and (e)  $C\cdots C$  contacts.

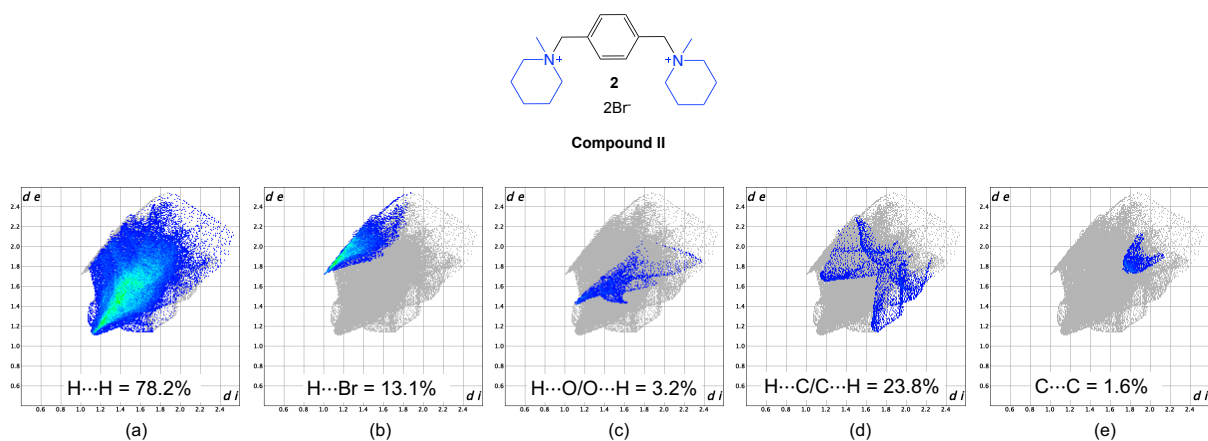

Figure S2. (Top) Chemical diagram for compound **II**. Fingerprint plots delineated into (a)  $H\cdots H$ , (b)  $H\cdots Br$ , (c)  $H\cdots O / O\cdots H$ , (d)  $H\cdots C / C\cdots H$ , and (e)  $C\cdots C$  contacts.

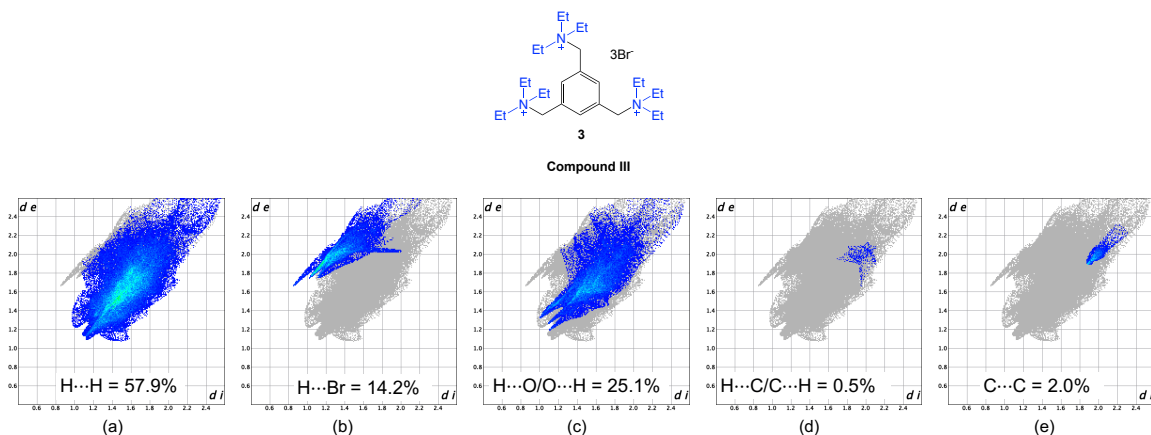

Figure S3. (Top) Chemical diagram for compound **III**. Fingerprint plots delineated into (a) H···H, (b) H···Br, (c) H···O / O···H, (d) H···C / C···H, and (e) C···C contacts.

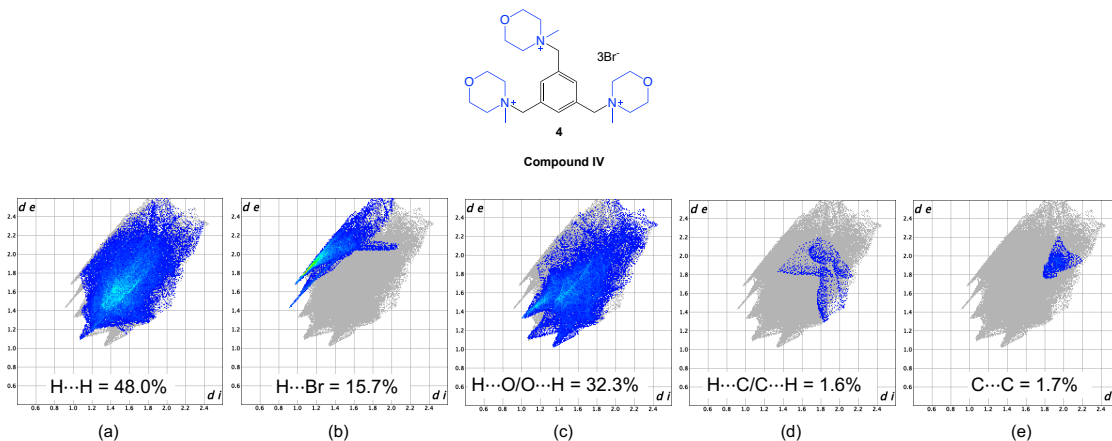

Figure S4. (Top) Chemical diagram for compound **IV**. Fingerprint plots delineated into (a) H···H, (b) H···Br, (c) H···O / O···H, (d) H···C / C···H, and (e) C···C contacts.

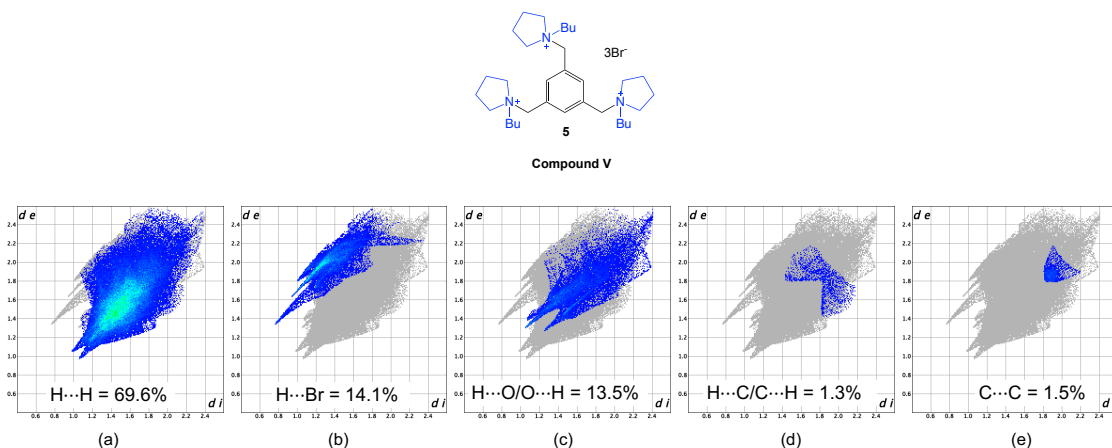

Figure S5. (Top) Chemical diagram for compound **V**. Fingerprint plots delineated into (a) H···H, (b) H···Br, (c) H···O / O···H, (d) H···C / C···H, and (e) C···C contacts.

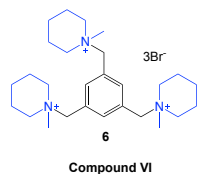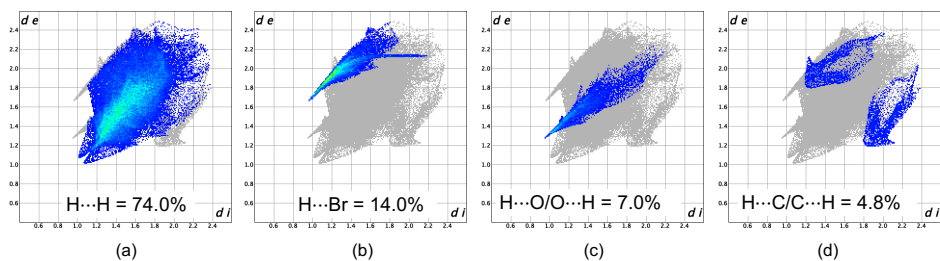

Figure S6. (Top) Chemical diagram for compound **VI**. Fingerprint plots delineated into (a)  $H\cdots H$ , (b)  $H\cdots Br$ , (c)  $H\cdots O/O\cdots H$ , and (d)  $H\cdots C/C\cdots H$  contacts.

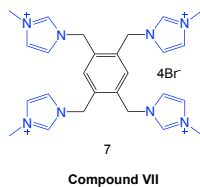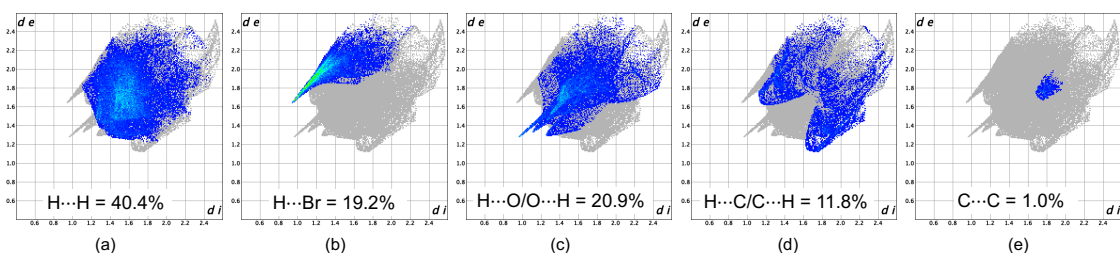

Figure S7. (Top) Chemical diagram for compound **VII**. Fingerprint plots delineated into (a)  $H\cdots H$ , (b)  $H\cdots Br$ , (c)  $H\cdots O/O\cdots H$ , (d)  $H\cdots C/C\cdots H$ , and (e)  $C\cdots C$  contacts.

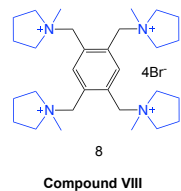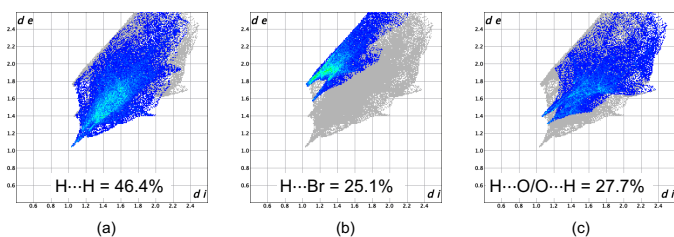

Figure S8. (Top) Chemical diagram for compound **VIII**. Fingerprint plots delineated into (a)  $H\cdots H$ , (b)  $H\cdots Br$ , and (c)  $H\cdots O/O\cdots H$  contacts.

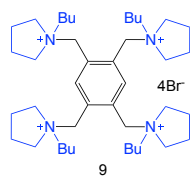

Compound IX

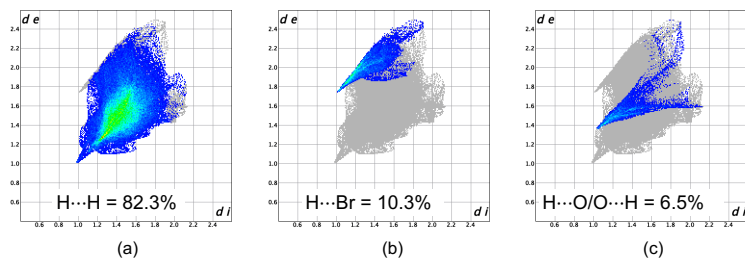

Figure S9. (Top) Chemical diagram for compound IX. Fingerprint plots delineated into (a)  $H \cdots H$ , (b)  $H \cdots Br$ , and (c)  $H \cdots O / O \cdots H$  contacts.
